# Supplementary material for: Comparative genomics of Acinetobacter baumannii and therapeutic bacteriophages from a patient undergoing phage therapy
Source: PubMed Central journal article supplement (PMC9247103; doi:10.1038/s41467-022-31455-5), 2022-06-30
Supplement: 41467_2022_31455_MOESM1_ESM.pdf [file 41467_2022_31455_MOESM1_ESM.pdf]

Supplementary Table 1. Primers used to complete the genome sequences reported in this study.

| <b>Primers used to complete phage genome sequences</b> |                         |                               |  |
|--------------------------------------------------------|-------------------------|-------------------------------|--|
| <b>Primer name</b>                                     | <b>Primer direction</b> | <b>sequence (5' -&gt; 3')</b> |  |
| C2P21/24                                               | FWD                     | CTAGGACAACCTGTGCGTCGCC        |  |
| C2P21/24                                               | REV                     | CCAGGAATTAAGCAGTTTGCACG       |  |
| AB-Navy1                                               | FWD                     | GCATGTGGAGCTAATACTGAGGA       |  |
| AB-Navy1                                               | REV                     | GTAGAGCACTACGATGGTGACA        |  |
| AB-Navy4                                               | FWD                     | GCCGGATAATTTTAAACCTGCA        |  |
| AB-Navy4                                               | REV                     | GCACCAGTAACAGTTGCAGTAA        |  |
| AB-Navy71                                              | FWD                     | TTTGATTCGAAAATCAAATCGATCAAAG  |  |
| AB-Navy71                                              | REV                     | CCTTAATTGCTGCATTAGCTG         |  |
| AB-Navy97                                              | FWD                     | GAAGGCCATATTTTCTAGTGCC        |  |
| AB-Navy97                                              | REV                     | CCTGATAGTTCTGCGCTTAATG        |  |
| AB-TP3Φ1                                               | FWD                     | AGAGCGAATGCATAGAAAGAC         |  |
| AB-TP3Φ1                                               | REV                     | GAACATCACTCAGAGAGTGT          |  |

  

| <b>Primers used to complete bacterial genome sequences</b> |                         |                               |                               |
|------------------------------------------------------------|-------------------------|-------------------------------|-------------------------------|
| <b>TP1</b>                                                 |                         |                               |                               |
| <b>Primer name</b>                                         | <b>Primer direction</b> | <b>sequence (5' -&gt; 3')</b> | <b>location on TP1 genome</b> |
| JDC F1 TP1 C1-2                                            | FWD                     | TTGGGAACCGCTTTCACCAT          | 1377633                       |
| JDC F1 TP1 C5-1                                            | REV                     | GGCTGCACAGTGGTTTTCTG          | 1379144                       |
| TP1_gap3_FWD                                               | FWD                     | TGGTCCACATACAGTGGCTG          | 837881                        |
| TP1_gap3_REV                                               | REV                     | GCGAGATCTGTGAAAAGTCGC         | 843014                        |
| TP1_gap5_FWD                                               | FWD                     | TTGGGCTGTGATTCGTTTCGT         | 1381828                       |
| TP1_gap5_REV                                               | REV                     | CCGTGGTTCTGGGTTTTTGC          | 1382823                       |

  

| <b>TP2</b>         |                         |                               |                               |
|--------------------|-------------------------|-------------------------------|-------------------------------|
| <b>Primer name</b> | <b>Primer direction</b> | <b>sequence (5' -&gt; 3')</b> | <b>location on TP1 genome</b> |
| TP2_end_FWD2       | FWD                     | TTCTGGCTTCCCGCAATGAG          | 2492088                       |
| TP2_end_REV2       | REV                     | GCACAAGGTAAGCGTAGAGC          | 2492860                       |
| TP2_FWD            | FWD                     | ATATGCACCGCCAGACAAGG          | 2543120                       |
| TP2_REV            | REV                     | AAGCGGCTGAGCAAGGAAAT          | 2492807                       |

  

| <b>TP3</b>         |                         |                               |                               |
|--------------------|-------------------------|-------------------------------|-------------------------------|
| <b>Primer name</b> | <b>Primer direction</b> | <b>sequence (5' -&gt; 3')</b> | <b>location on TP1 genome</b> |
| TP3_end_FWD2       | FWD                     | ACCAAGCCAACCTCCCACGAA         | 1965094                       |
| TP3_end_REV2       | REV                     | GGCAGCGGAAGAGCCAATTC          | 2024403                       |
| TP3_ends_FWD1      | FWD                     | CACAATTAGGGGGCGTAAAAATCA      | 2023907                       |
| TP3_ends_REV1      | REV                     | CATGCTCGGCCAGAAATTCG          | 1965873                       |
| TP3_gap1_FWD1      | FWD                     | AGACTGAGGCTGAGGAGGAG          | 547097                        |
| TP3_gap1_REV1      | REV                     | TCCAAAGCCCCTTCTGCATT          | 558195                        |
| TP3_gap1_REV2      | REV                     | ATAAGCTCCTCCTGCCGTTG          | 547700                        |

Supplementary Table 2. Antibiotic susceptibility of some strains collected from the patient during phage treatment.

| Bacterial strains                  |                           |                      | Antibiotic sensitivity |                      |          |             |             |               |          |            |           |              |             |            |           |             |                               |
|------------------------------------|---------------------------|----------------------|------------------------|----------------------|----------|-------------|-------------|---------------|----------|------------|-----------|--------------|-------------|------------|-----------|-------------|-------------------------------|
| CPT Strain name                    | Date of sample collection | Source               | Amikacin               | Ampicillin/Sulbactam | Cefepime | Ceftazidime | Ceftriaxone | Ciprofloxacin | Colistin | Gentamicin | Meropenem | Tetracycline | Tigecycline | Tobramycin | Doripenem | Minocycline | Trimethoprim/Sulfamethoxazole |
| TP1                                | 2/10/2016                 |                      | R                      | ND                   | R        | R           | R           | R             | ND       | R          | R         | R            | ND          | R          | ND        | ND          | S                             |
| AB-SD2                             | 3/14/2016                 |                      |                        |                      |          |             |             |               |          |            |           |              |             |            |           |             |                               |
| Start of phage therapy: March 15th |                           |                      |                        |                      |          |             |             |               |          |            |           |              |             |            |           |             |                               |
| AB-SD4                             | 3/17/2016                 | Abscess- Drain 3     | R                      | ND                   | R        | R           | R           | R             | ND       | R          | R         | R            | ND          | R          | ND        | ND          | R                             |
| AB-2392                            | 3/17/2016                 |                      | R                      | ND                   | R        | R           | R           | R             | ND       | R          | R         | R            | ND          | R          | ND        | ND          | S                             |
| AB-2399                            | 3/17/2016                 | Drain 3              |                        |                      |          |             |             |               |          |            |           |              |             |            |           |             |                               |
| AB-SD1                             | 3/19/2016                 | Drain 5              |                        |                      |          |             |             |               |          |            |           |              |             |            |           |             |                               |
| AB-SD3                             | 3/19/2016                 | Drain 3              |                        |                      |          |             |             |               |          |            |           |              |             |            |           |             |                               |
| AB-2755                            | 3/19/2016                 | Drain 1              | R                      | ND                   | R        | R           | R           | R             | 4ug/ml   | R          | R         | R            | I           | R          | R         | ND          | R                             |
| TP2                                | 3/21/2016                 | Drainage 1           | I                      | S                    | ND       | R           | I           | S             | ND       | R          | S         | R            | ND          | I          | ND        | ND          | S                             |
| AB-SD5                             | 3/21/2016                 | Bronchial wash       |                        |                      |          |             |             |               |          |            |           |              |             |            |           |             |                               |
| TP3                                | 3/23/2016                 | Drain 1              | R                      | ND                   | R        | R           | R           | R             | ND       | R          | R         | R            | ND          | R          | ND        | ND          | R                             |
| AB-0280                            | 3/31/2016                 |                      | R                      | R                    | R        | R           | R           | R             | ND       | R          | R         | R            | ND          | R          | ND        | ND          | S                             |
| AB-1485                            | 5/9/2016                  | Drain 3              | R                      | R                    | R        | R           | R           | R             | 2ug/ml   | R          | R         | R            | 6ug/ml      | R          | ND        | R           | S                             |
| AB-3804                            | 5/9/2016                  | Drain 1              | R                      | R                    | R        | R           | R           | R             | 4ug/ml   | R          | R         | R            | 8ug/ml      | R          | ND        | R           | S                             |
| AB-3819                            | 5/9/2016                  | Drain 3 (2nd sample) | R                      | R                    | R        | R           | R           | R             | 2ug/ml   | R          | R         | R            | 6ug/ml      | R          | ND        | R           | S                             |
| AB-3847                            | 5/9/2016                  | Drain 5              | R                      | R                    | R        | R           | R           | R             | 4ug/ml   | R          | R         | R            | 8ug/ml      | R          | ND        | R           | S                             |
| AB-0214                            | 5/16/2016                 | Drain 5              | R                      | R                    | R        | R           | R           | R             | ND       | R          | R         | R            | ND          | R          | ND        | ND          | S                             |
| AB-0779                            | 5/16/2016                 | Drain 1              | R                      | R                    | R        | R           | R           | R             | ND       | R          | R         | R            | ND          | R          | ND        | ND          | S                             |
| AB-0780                            | 5/16/2016                 |                      | R                      | R                    | R        | R           | R           | R             | ND       | R          | R         | R            | ND          | R          | ND        | ND          | S                             |

Note: (1) Antibiotic resistance profiles were determined at the UCSD clinical laboratory. (2) Strains are determined to be either sensitive (S), resistant (R) or have an intermediate (I) phenotype. Sensitivity to some antibiotics was not determined (ND). Isolates with blank rows were not tested for AMR.

**Supplementary Table 3. Locations of K locus and prophages in *A. baumannii* strains TP1, TP2, TP3.**

**K Locus**

|     | start position | end position | length (bp) | genes | Best match locus | Coverage | Identity |
|-----|----------------|--------------|-------------|-------|------------------|----------|----------|
| TP1 | 3774031        | 3794556      | 20526       | 17    | KL116            | 100%     | 97.4%    |
| TP2 | 3780056        | 3800575      | 20520       | 17    | KL116            | 100%     | 97.4%    |
| TP3 | 3781228        | 3801747      | 20520       | 17    | KL116            | 100%     | 97.4%    |

**Prophages in strain TP1 (NZ\_CP056784.2)\***

|            | start position | end position | length (bp) | att sequence                                             |
|------------|----------------|--------------|-------------|----------------------------------------------------------|
| Prophage 1 | 2671137        | 2723699      | 52563       | tgaacttaggggtcaagggtacgacatgcagcggcatctcggagcattatttttaa |
| Prophage 2 | 2895491        | 2938252      | 42762       | gtatttggggagatggcgggagttgaac                             |

\*same prophages are identified in TP2 and TP3

Supplementary Table 4. Genomic changes in *A. baumannii* TP2 compared to TP1.

| Genome ref | Mutation type | Position in TP1 | Length | Position in TP2 | Mutation                   | TP2 Genes affected                                                                                                                                                                                                                                                                                                                                                                           | Notes                                   |
|------------|---------------|-----------------|--------|-----------------|----------------------------|----------------------------------------------------------------------------------------------------------------------------------------------------------------------------------------------------------------------------------------------------------------------------------------------------------------------------------------------------------------------------------------------|-----------------------------------------|
| TP1        | insertion     | 111357          | 6673   | 111361          | large IS element insertion | APH(3')-VI family aminoglycoside-O-phosphotransferase, IS30-like element ISAbal25 family transposase, subclass B1 metallo-beta-lactamase, bleomycin binding protein Ble-MBL, phosphoribosylanthranilate isomerase, protein-disulfide reductase DsbD N-terminal domain-containing protein, divalent-cation tolerance protein CutA, IS3-like element ISAbal4 family transposase, all inserted. | 8 new genes                             |
| TP1        | SNP           | 768428          | 1      | 775105          | cA, Ala to Glu             | two-component system sensor histidine kinase PmrB                                                                                                                                                                                                                                                                                                                                            |                                         |
| TP1        | SNP           | 848350          | 1      | 854712          | aT                         | intergenic                                                                                                                                                                                                                                                                                                                                                                                   |                                         |
| TP1        | deletion      | 1356493         | 1090   | 1362854         | IS element lost            | IS30 family transposase is lost in TP2                                                                                                                                                                                                                                                                                                                                                       |                                         |
| TP1        | insertion     | 1381905         | 1845   | 1387177         | IS element insertion       | IS6-like element IS26 family transposase, aminoglycoside O-phosphotransferase APH(3')-Ia"                                                                                                                                                                                                                                                                                                    | 2 new genes                             |
| TP1        | deletion      | 1679979         | 1189   | 1687155         | IS element lost            | IS4 family transposase ISAbal1 is lost in TP2                                                                                                                                                                                                                                                                                                                                                |                                         |
| TP1        | insertion     | 2520267         | 1091   | 2526319         | IS element insertion       | inserted a IS30 family transposase in TP2                                                                                                                                                                                                                                                                                                                                                    |                                         |
| TP1        | SNP           | 2840989         | 1      | 2848094         | cC, Ile to Thr             | hypothetical protein                                                                                                                                                                                                                                                                                                                                                                         |                                         |
| TP1        | deletion      | 3143593         | 1094   | 3150708         | IS element lost            | IS30 family transposase is lost in TP2                                                                                                                                                                                                                                                                                                                                                       |                                         |
| TP1        | deletion      | 3786215         | 6      | 3792200         | 2 AA deleted in frame      | glycosyltransferase                                                                                                                                                                                                                                                                                                                                                                          | Same mutation found in in vitro mutants |

Supplementary Table 5. Genomic changes in *A. baumannii* TP3 compared to TP1.

| Genome_ref | Mutation type | Position in TP1 | Length | Position in TP3 | Mutation                   | TP3 Genes affected                                                                                                                                                                                                                                                                                                                                              | Notes                                   |
|------------|---------------|-----------------|--------|-----------------|----------------------------|-----------------------------------------------------------------------------------------------------------------------------------------------------------------------------------------------------------------------------------------------------------------------------------------------------------------------------------------------------------------|-----------------------------------------|
| TP1        | insertion     | 111357          | 6673   | 111359          | large IS element insertion | ARG cassette: APH(3')-VI family aminoglycoside O-phosphotransferase, IS30-like element ISAb125 family transposase, subclass B1 metallo-beta-lactamase, bleomycin binding protein Ble-MBL, phosphoribosylanthranilate isomerase, protein-disulfide reductase DsbD N-terminal domain-containing protein, divalent-cation tolerance protein CutA, IS3-like element | 8 new genes.                            |
| TP1        | deletion      | 1356492         | 1090   | 1362845         | IS element lost            | IS30 family transposase is lost in TP3                                                                                                                                                                                                                                                                                                                          |                                         |
| TP1        | insertion     | 1381905         | 1886   | 1387168         | IS element insertion       | IS6-like element IS26 family transposase and aminoglycoside O-phosphotransferase APH(3')-Ia                                                                                                                                                                                                                                                                     | 2 new genes                             |
| TP1        | SNP           | 2840989         | 1      | 2848220         | cC, Ile to Thr             | hypothetical protein                                                                                                                                                                                                                                                                                                                                            |                                         |
| TP1        | insertion     | 2880890         | 1090   | 2888121         | IS element insertion       | IS30-like element ISAb125 family transposase                                                                                                                                                                                                                                                                                                                    |                                         |
| TP1        | deletion      | 3143593         | 1090   | 3151919         | IS element lost            | IS30 family transposase is lost in TP3                                                                                                                                                                                                                                                                                                                          |                                         |
| TP1        | deletion      | 3786204         | 6      | 3793401         | 2 AA deleted in frame      | glycosyltransferase                                                                                                                                                                                                                                                                                                                                             | Same mutation found in in vitro mutants |



```

AB-Navy4      1 MALDPPNRIKFLRSTAGAKPTTAAIQPGEIAINLADRTLYSTDGNAIDIQFGLGQSVNPIINATQIISTNDFLYSKYQFSUNSETADGRISLYGNYTASNLPSYGLAMAATSKYGTGAVGSSHATYLTINSGTNRWIFNYNGTTNVAISISGTIATFARVDPALNQNANTATKLOSARNINQVL 102
AB-Navy1      1 MALDPPNRIKFLRSTAGAKPTTAAIQPGEIAINLADRTLYSTDGNAIDIQFGLGQSVNPIINATQIISTNDFLYSKYQFSUNSETADGRISLYGNYTASNLPSYGLAMAATSKYGTGAVGSSHATYLTINSGTNRWIFNYNGTTNVAISISGTIATFARVDPALNQNANTATKLOSARNINQVL 102
AB-Navy97     1 MALDPPNRIKFLRSTAGAKPTTAAIQPGEIAINLADRTLYSTDGNAIDIQFGLGQSVNPIINATQIISTNDFLYSKYQFSUNSETADGRISLYGNYTASNLPSYGLAMAATSKYGTGAVGSSHATYLTINSGTNRWIFNYNGTTNVAISISGTIATFARVDPALNQNANTATKLOSARNINQVL 102
Maestro      1 MALDPPNRIKFLRSTAGAKPTTAAIQPGEIAINLADRTLYSTDGNAIDIQFGLGQSVNPIINATQIISTNDFLYSKYQFSUNSETADGRISLYGNYTASNLPSYGLAMAATSKYGTGAVGSSHATYLTINSGTNRWIFNYNGTTNVAISISGTIATFARVDPALNQNANTATKLOSARNINQVL 101
AC4          1 MALDPPNRIKFLRSTAGAKPTTAAIQPGEIAINLADRTLYSTDGNAIDIQFGLGQSVNPIINATQIISTNDFLYSKYQFSUNSETADGRISLYGNYTASNLPSYGLAMAATSKYGTGAVGSSHATYLTINSGTNRWIFNYNGTTNVAISISGTIATFARVDPALNQNANTATKLOSARNINQVL 101
AB-Navy71    1 MALDPPNRIKFLRSTAGAKPTTAAIQPGEIAINLADRTLYSTDGNAIDIQFGLGQSVNPIINATQIISTNDFLYSKYQFSUNSETADGRISLYGNYTASNLPSYGLAMAATSKYGTGAVGSSHATYLTINSGTNRWIFNYNGTTNVAISISGTIATFARVDPALNQNANTATKLOSARNINQVL 101

AB-Navy4      103 FDGTDSDINTPAIDVVVSFNRTVKP.....SDVRNKAMGVYFSSKAGLNGAANDNYGDFLSLSTYDGGTGGKNGLYFKNLSREILHYQD.....LNSNSWGTPTKIAYDSSITGMAAS..ATRLQARTINGTAFDQ...TANIINV..NATYSEFIPDGANLNDYKTPGLYDPTDAGAATQLNL 363
AB-Navy1      103 FDGTDSDINTPAIDVVVSFNRTVKP.....SDVRNKAMGVYFSSKAGLNGAANDNYGDFLSLSTYDGGTGGKNGLYFKNLSREILHYQD.....LNSNSWGTPTKIAYDSSITGMAAS..ATRLQARTINGTAFDQ...TANIINV..NATYSEFIPDGANLNDYKTPGLYDPTDAGAATQLNL 363
AB-Navy97     103 FDGTDSDINTPAIDVVVSFNRTVKP.....SDVRNKAMGVYFSSKAGLNGAANDNYGDFLSLSTYDGGTGGKNGLYFKNLSREILHYQD.....LNSNSWGTPTKIAYDSSITGMAAS..ATRLQARTINGTAFDQ...TANIINV..NATYSEFIPDGANLNDYKTPGLYDPTDAGAATQLNL 363
Maestro      102 FDGTRDITIEDSTKLYENLVLTASDSSRVIKRVATTIRAMGIT.....VNGALII.....HLPKAAR.....NASTMMKIIIGDFDYSPROATSSNWSVDISQYNTTAAWISYQAIISQSPAPFDIWRWSGADHCVIILGEEA.....GASPSWSYNIISIEKIYLT..SNNTALYDNDP..... 261
AC4          102 FDGTRDITIEDSTKLYENLVLTASDSSRVIKRVATTIRAMGIT.....VNGALII.....HLPKAAR.....NASTMMKIIIGDFDYSPROATSSNWSVDISQYNTTAAWISYQAIISQSPAPFDIWRWSGADHCVIILGEEA.....GASPSWSYNIISIEKIYLT..SNNTALYDNDP..... 261
AB-Navy71    102 FDGTRDITIEDSTKLYENLVLTASDSSRVIKRVATTIRAMGIT.....VNGALII.....HLPKAAR.....NASTMMKIIIGDFDYSPROATSSNWSVDISQYNTTAAWISYQAIISQSPAPFDIWRWSGADHCVIILGEEA.....GASPSWSYNIISIEKIYLT..SNNTALYDNDP..... 265

AB-Navy4      394 PFSNAYSLFVERHAGIKOTIQYATNKTFIRKFYNGYDNRQLAFLDPSDKFTENITLEKASS..AIIKVKSTTGSSELISLNGKNTASVLTLDGSGFIICDSTRSSFAFTFDPGVQVILNSKLLINTPASLVNLTGGTFEAVTGGESSPIRFKII..NRGGAITINSPTVGVSSIPHAIISFNWYNTIEWI 552
AB-Navy1      394 PFSNAYSLFVERHAGIKOTIQYATNKTFIRKFYNGYDNRQLAFLDPSDKFTENITLEKASS..AIIKVKSTTGSSELISLNGKNTASVLTLDGSGFIICDSTRSSFAFTFDPGVQVILNSKLLINTPASLVNLTGGTFEAVTGGESSPIRFKII..NRGGAITINSPTVGVSSIPHAIISFNWYNTIEWI 552
AB-Navy97     394 PFSNAYSLFVERHAGIKOTIQYATNKTFIRKFYNGYDNRQLAFLDPSDKFTENITLEKASS..AIIKVKSTTGSSELISLNGKNTASVLTLDGSGFIICDSTRSSFAFTFDPGVQVILNSKLLINTPASLVNLTGGTFEAVTGGESSPIRFKII..NRGGAITINSPTVGVSSIPHAIISFNWYNTIEWI 552
Maestro      296 .....IYL.....TIEDSLPNTLQVLT.....PL.....EGV.....NLAKSLRKRFTFTFDATGSLAFDGTANVSTALTINSATTGQ..... 331
AC4          296 .....IYL.....TIEDSLPNTLQVLT.....PL.....EGV.....NLAKSLRKRFTFTFDATGSLAFDGTANVSTALTINSATTGQ..... 327
AB-Navy71    296 .....IYL.....TIEDSLPNTLQVLT.....PL.....EGV.....NLAKSLRKRFTFTFDATGSLAFDGTANVSTALTINSATTGQ..... 327

AB-Navy4      653 GNVRDGSSTGVGFIITGNNTLVWRHGNMTMNY..GNISNTGQ.....ISTGDDISSNGLSTAGSISGDSLIRTRGRIAPTSTYHYLDIGRGGDITTVGGYGGAFRVVDSNGATSFYVDPVDAKFSGKIITTKPVTFYWNVTDLGNSTAAITVPDAIAPMCKTGYAPFIIHGSVQTD 735
AB-Navy1      653 GNVRDGSSTGVGFIITGNNTLVWRHGNMTMNY..GNISNTGQ.....ISTGDDISSNGLSTAGSISGDSLIRTRGRIAPTSTYHYLDIGRGGDITTVGGYGGAFRVVDSNGATSFYVDPVDAKFSGKIITTKPVTFYWNVTDLGNSTAAITVPDAIAPMCKTGYAPFIIHGSVQTD 744
AB-Navy97     653 GNVRDGSSTGVGFIITGNNTLVWRHGNMTMNY..GNISNTGQ.....ISTGDDISSNGLSTAGSISGDSLIRTRGRIAPTSTYHYLDIGRGGDITTVGGYGGAFRVVDSNGATSFYVDPVDAKFSGKIITTKPVTFYWNVTDLGNSTAAITVPDAIAPMCKTGYAPFIIHGSVQTD 743
Maestro      332 .....A.....GLVKLNTLTSVTEALTAAGKALDQTKVNRSGDIIISGR.....LVVTGQII.....TTPSISNDVTP..ISFLGSPVNN..SNAAGIRVRNLEVINNYQVATRAFGIIS.....KE.....DIIAAGSASLASDIOGNINIPFKVUNTWLVTTFVDFLGGHVS 479
AC4          332 .....A.....GLVKLNTLTSVTEALTAAGKALDQTKVNRSGDIIISGR.....LVVTGQII.....TTPSISNDVTP..ISFLGSPVNN..SNAAGIRVRNLEVINNYQVATRAFGIIS.....KE.....DIIAAGSASLASDIOGNINIPFKVUNTWLVTTFVDFLGGHVS 479
AB-Navy71    332 .....A.....GLVKLNTLTSVTEALTAAGKALDQTKVNRSGDIIISGR.....LVVTGQII.....TTPSISNDVTP..ISFLGSPVNN..SNAAGIRVRNLEVINNYQVATRAFGIIS.....KE.....DIIAAGSASLASDIOGNINIPFKVUNTWLVTTFVDFLGGHVS 479

AB-Navy4      726 EGVITNHSIGARNSNTSSGAYIAIGNDNYTTEDFRMTGGYIGTSOGLTLGLTLNAR.....LAED.....PANADNITY..TEEF.....YDCTNAVAKITNG..PFTGGAFELVRTAGVKTFTIYSPS..... 808
AB-Navy1      745 EGYRTNVSIGAWRSNTSSGAYIAIGNDNYTTEDFRMTGGYIGTSOGLTLGLTLNAR.....LAED.....PANADNITY..TEEF.....YDCTNAVAKITNG..PFTGGAFELVRTAGVKTFTIYSPS..... 828
AB-Navy97     744 EGYRTNVSIGAWRSNTSSGAYIAIGNDNYTTEDFRMTGGYIGTSOGLTLGLTLNAR.....LAED.....PANADNITY..TEEF.....YDCTNAVAKITNG..PFTGGAFELVRTAGVKTFTIYSPS..... 828
Maestro      480 ELOYMNVISIGVYRPPRNDNSOMYSI..GANDNYSTEAFLEKDRTEINTNRI..LKNADSKATKOTPRITNGVAFDQTSNRIIG.....DLAED.....PANADNITY..TEEF.....YDCTNAVAKITNG..PFTGGAFELVRTAGVKTFTIYSPS..... 608
AC4          476 SSGVYRTTISIGVYRPPRNDNSOMYSI..GANDNYSTEAFLEKDRTEINTNRI..LKNADSKATKOTPRITNGVAFDQTSNRIIG.....DLAED.....PANADNITY..TEEF.....YDCTNAVAKITNG..PFTGGAFELVRTAGVKTFTIYSPS..... 608
AB-Navy71    480 SSGVYRTTISIGVYRPPRNDNSOMYSI..GANDNYSTEAFLEKDRTEINTNRI..LKNADSKATKOTPRITNGVAFDQTSNRIIG.....DLAED.....PANADNITY..TEEF.....YDCTNAVAKITNG..PFTGGAFELVRTAGVKTFTIYSPS..... 608

AB-Navy4      780 .....TINS.....TTFNVQ 798
AB-Navy1      808 .....TINS.....TTFNVQ 817
AB-Navy97     807 .....TINS.....TTFNVQ 816
Maestro      629 ..SRTWIRNIIYGGTDAWRE.....VAV.....TD.....AFTTGAAGRTGAL.....TVNG.....INTNTLNSNDLRSOSYLGNOQTELOIGTASQVYIDFHSGSNIIDYDARIMSSGGTIAINGALSIIAASHAFNRVDDGLIS.....ASTGLG 700
AC4          666 YQTSWVKDFQYTAOAKPDGAVDYYVNTLDLSDPEVFGAIFTKNSVATPAKNTFEYTKLSMIPPHTGQ..GTWLHRLNDTSTAIEYIIKYGPTPVLRMDSQVTVYATLRNSGATLGNQMLGNQVATPVYIDFHSGSNIIDYDARIMSSGGTIAINGALSIIAASHAFNRVDDGLIS.....ASTGLG 851
AB-Navy71    667 YQTSWVKDFQYTAOAKPDGAVDYYVNTLDLSDPEVFGAIFTKNSVATPAKNTFEYTKLSMIPPHTGQ..GTWLHRLNDTSTAIEYIIKYGPTPVLRMDSQVTVYATLRNSGATLGNQMLGNQVATPVYIDFHSGSNIIDYDARIMSSGGTIAINGALSIIAASHAFNRVDDGLIS.....ASTGLG 852

AB-Navy4      799 TINSITVHVASNLCFSTF..FELNG..IYNGND.....GATLANALDIAHYBLGIDKLNLR.....NIVNSRTEIGTRGV..IRIGNTS..AETLLINDSHQI..L..TSGRAK.....DIAAGVLA.....SDAYA 816
AB-Navy1      816 TIVNTINIAQGSIVMSAAPGSGRS..MYTNGD.....GASFSTCIDIGSHWBLGFKNLGNR.....NIPDTRAGNASFGS..IRIGASFA..DETOLLPTNSQLQI..L..TSGGAR.....NISTGQVLA.....SDAYA 936
AB-Navy97     817 TIVNTINIAQGSIVMSAAPGSGRS..MYTNGD.....GASFSTCIDIGSHWBLGFKNLGNR.....NIPDTRAGNASFGS..IRIGASFA..DETOLLPTNSQLQI..L..TSGGAR.....NISTGQVLA.....SDAYA 936
Maestro      787 IANTSITVLAQSLV..GASQSKNYITF..ASTGNAGTGHQDDLNASWAVVLTGATAGAEKRGWIFORSNDNTNVAISITHEVLSNTHIQTLNDNTMINVGNKDLAKVRSKAFIDVAMPTFVSQSKNANWDDPTHTFTLFTFUSAGVNAVGETEETESGENTHISLISLGNKASATLLO 958
AC4          852 ISNTSITVLAQSLV..GASQSKNYITF..ASTGNAGTGHQDDLNASWAVVLTGATAGAEKRGWIFORSNDNTNVAISITHEVLSNTHIQTLNDNTMINVGNKDLAKVRSKAFIDVAMPTFVSQSKNANWDDPTHTFTLFTFUSAGVNAVGETEETESGENTHISLISLGNKASATLLO 1039
AB-Navy71    853 ISNTSITVLAQSLV..GASQSKNYITF..ASTGNAGTGHQDDLNASWAVVLTGATAGAEKRGWIFORSNDNTNVAISITHEVLSNTHIQTLNDNTMINVGNKDLAKVRSKAFIDVAMPTFVSQSKNANWDDPTHTFTLFTFUSAGVNAVGETEETESGENTHISLISLGNKASATLLO 1044

AB-Navy4      916 BWNVVPVNGIWSKDIKT.....S..T.....WYASKFIDRTG..SDGMDGNANTATRLQARTFOITGGIITNAVVSFDGQNVLTASNVDGSKVSVVPEAV.....KAQTLAVTPQKNAKLVASWKGITLQSMPTPLTIVDANTLVRRLADDPNSRNLVLRNVKI 1009
AB-Navy1      937 DASKVPVNGIYKSDIIC.....SS.....YVACRYVIGITGPNITGFDGNANTATRLQARTFOITGGIITNAVVSFDGQNVLTASNVDGSKVSVVPEAV.....KAQTLAVTPQKNAKLVASWKGITLQSMPTPLTIVDANTLVRRLADDPNSRNLVLRNVKI 1002
AB-Navy97     936 DASKVPVNGIYKSDIIC.....S.....YVACRYVIGITGPNITGFDGNANTATRLQARTFOITGGIITNAVVSFDGQNVLTASNVDGSKVSVVPEAV.....KAQTLAVTPQKNAKLVASWKGITLQSMPTPLTIVDANTLVRRLADDPNSRNLVLRNVKI 1009
Maestro      105 TARAIGITSGASGVS.....FDGSONNIPLSVATGATANTNTIATTFVQ.....NVMVETASAYAVRLKTPRSFOITGGIITNAVVSFDGQNVLTASNVDGSKVSVVPEAV.....KAQTLAVTPQKNAKLVASWKGITLQSMPTPLTIVDANTLVRRLADDPNSRNLVLRNVKI 1187
AC4          1040 FSVIHAQVGSSEVERLQANYTEENTIASALHWNSSO.....YQVQITLKL..LAI..I..ADNVASATKLTARTFOITGGIITNAVVSFDGQNVLTASNVDGSKVSVVPEAV.....KAQTLAVTPQKNAKLVASWKGITLQSMPTPLTIVDANTLVRRLADDPNSRNLVLRNVKI 1215
AB-Navy71    1046 TARAIGITSGASGVS.....FDGSONNIPLSVATGATANTNTIATTFVQ.....NVMVETASAYAVRLKTPRSFOITGGIITNAVVSFDGQNVLTASNVDGSKVSVVPEAV.....KAQTLAVTPQKNAKLVASWKGITLQSMPTPLTIVDANTLVRRLADDPNSRNLVLRNVKI 1224

AB-Navy4      1070 GTVYHLAFSDTMLPILIN.....GTVTRVETG..LTTWEVDLNSPHHGLVGTGNGVNUMAITYSAYGYFEGSISDIIIGTGPQDSOWAYVLKLSNPTDATTNLSGSSQSDVNM..ADKNIWYLNPAQPVITAGAMI..SPDRLNFFAADTDAI..RMRNSNMVTAQIWDIV 1227
AB-Navy1      1093 GTVYHLAFSDTMLPILIN.....GTVTRVETG..LTTWEVDLNSPHHGLVGTGNGVNUMAITYSAYGYFEGSISDIIIGTGPQDSOWAYVLKLSNPTDATTNLSGSSQSDVNM..WDKDIWYLNPAQPVITAGAMI..SPDRLNFFAADTDAI..RMRNSNMVTAQIWDIV 1250
AB-Navy97     1090 GTVYHLAFSDTMLPILIN.....GTVTRVETG..LTTWEVDLNSPHHGLVGTGNGVNUMAITYSAYGYFEGSISDIIIGTGPQDSOWAYVLKLSNPTDATTNLSGSSQSDVNM..WDKDIWYLNPAQPVITAGAMI..SPDRLNFFAADTDAI..RMRNSNMVTAQIWDIV 1247
Maestro      1136 SIVHFTFTGTCQ.....IISITISITAD..NSFLKQRLSPPAHMGSGGGLKLLAIITYSAYGYFEGTASTLNT..NONGSENSMLRLTEVNDPTNLSGSSQNS..RTFTNTQIMFLDHSQPVVLTGMSANRNFHTSDSDSAGAMPSSMWTIWDIV 1204
AC4          1216 SLLHGVFAGSTGWSNLSGRI..IDVITNRVSGVDAIVEIPIHSIPGNVTSF..IWLAVTYSNNSF..IGNIAAYAKDLGADSAWSLLRTSTAINNPSVSIISGDVATDRDLQGLWLSGKNI..IASSETMINSCTNFI..VSDNNNDVANSNGYISIDIVDVM 1380
AB-Navy71    1225 GNCLHVFAAGSTGWSNLSGRI..IDVITNRVSGVDAIVEIPIHSIPGNVTSF..IWLAVTYSNNSF..IGNIAAYAKDLGADSAWSLLRTSTAINNPSVSIISGDVATDRDLQGLWLSGKNI..IASSETMINSCTNFI..VSDNNNDVANSNGYISIDIVDVM 1388

```

**Supplemental Figure 2.** Multiple sequence alignment of the long tail fiber protein sequences of the myophages used in this study. The black box denotes the regions with homology to T4 gp37.

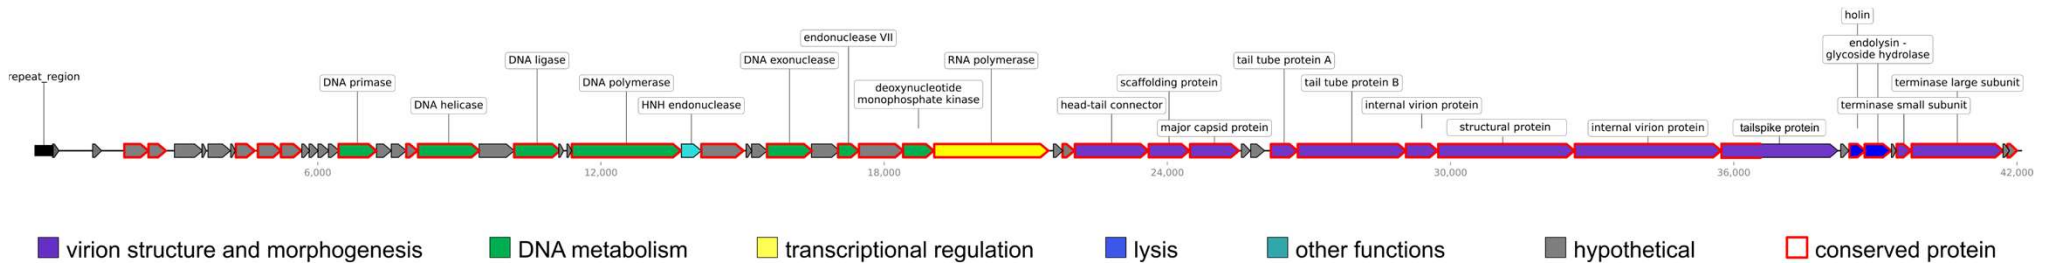

**Supplementary Figure 3.** Genome map of AbTP3Phi1. Predicted genes are represented by blocks, with blocks pointing to the right genes encoded on the forward strand, and blocks pointing to the left are on the reverse strand. The ruler below the genomes indicates scale in bp. Genes are color coded based on functions according to the legend; genes outlined in red are conserved in a set of 16 species representatives of the genus *Friunavirus*.
