# Supplementary material for: Comparative genomics of Acinetobacter baumannii and therapeutic bacteriophages from a patient undergoing phage therapy
Source: PubMed Central journal article supplement (PMC9247103; doi:10.1038/s41467-022-31455-5), 2022-06-30
Supplement: 41467_2022_31455_MOESM3_ESM.pdf [file 41467_2022_31455_MOESM3_ESM.pdf]

**Title:** Supplementary Data 1.

**Description:** BioLog phenotypic array plate layouts.

**Title:** Supplementary Data 2.

**Description:** Antibiotic resistance genes identified in *A. baumannii* strains TP1, TP2 and TP3 from the CARD database. Genes in strains TP2 and TP3 listed in red text are not present in strain TP1.
